1 **Transcriptomic analyses reveal groups of co-expressed, syntenic lncRNAs in four**  
2 **species of the genus *Caenorhabditis***

3

4 **Authors:** Cinta Pegueroles<sup>1,2</sup>, Susana Iraola-Guzmán<sup>1,2</sup>, Uciel P. Chorostecki<sup>1,2</sup>, Ewa Ksiezopolska<sup>1,2</sup>, Ester Saus<sup>1,2</sup>  
5 and Toni Gabaldón<sup>1,2,3,\*</sup>

6

7 <sup>1</sup>Centre for Genomic Regulation (CRG), The Barcelona Institute of Science and Technology, Barcelona, Spain

8 <sup>2</sup>Universitat Pompeu Fabra, Barcelona, Spain

9 <sup>3</sup>Institució Catalana de Recerca i Estudis Avançats (ICREA), Pg. Lluís Companys 23, 08010 Barcelona, Spain.

10

11 \*To whom correspondence should be addressed. Tel. +34 933160281. Email:

12 [toni.gabaldon@crg.eu](mailto:toni.gabaldon@crg.eu)

13

14

15 Running title: transcriptomic analyses of lncRNA in *Caenorhabditis*

## 16 **Abstract**

17 Long non-coding RNAs (lncRNAs) are a heterogeneous class of genes that do not code for proteins. Since  
18 lncRNAs (or a fraction thereof) are expected to be functional, many efforts have been dedicated to catalog  
19 lncRNAs in numerous organisms, but our knowledge of lncRNAs in non vertebrate species remains very limited.  
20 Here, we annotated lncRNAs using transcriptomic data from the same larval stage of four *Caenorhabditis* species.  
21 The number of annotated lncRNAs in self-fertile nematodes was lower than in out-crossing species. We used a  
22 combination of approaches to identify putatively homologous lncRNAs: synteny, sequence conservation, and  
23 structural conservation. We classified a total of 1,532 out of 7,635 genes from the four species into families of  
24 lncRNAs with conserved synteny and expression at the larval stage, suggesting that a large fraction of the  
25 predicted lncRNAs may be species specific. Despite both sequence and local secondary structure seem to be  
26 poorly conserved, sequences within families frequently shared BLASTn hits and short sequence motifs, which  
27 were more likely to be unpaired in the predicted structures. We provide the first multi-species catalog of lncRNAs  
28 in nematodes and identify groups of lncRNAs with conserved synteny and expression, that share exposed motifs.

29

30 **Keywords:** lncRNA, *Caenorhabditis*, synteny, secondary structure, motifs

## 31 1. Introduction

32 Long non-coding RNAs are a heterogeneous class of genes which basically comprises transcripts that are  
33 predicted to be non-coding and longer than 200nt. The fact that the first described lncRNAs were functional (e.g.  
34 XIST<sup>1</sup>, HG19<sup>2</sup>), coupled to the drastic decrease in price of the high-throughput sequencing technologies, promoted  
35 genome-wide screenings for lncRNAs in several vertebrate genomes. Only in the human genome there are  
36 currently annotated roughly 60K lncRNAs<sup>3</sup>. However, our knowledge of lncRNAs in non vertebrate species is  
37 very limited, with insects being the only exception. Indeed, several recent studies have annotated lncRNAs in  
38 several insect genera, including *Drosophila*<sup>4,5</sup>, *Anopheles*<sup>6</sup>, *Aedes*<sup>7</sup>, *Apis*<sup>8</sup>, *Polistes*<sup>9</sup>, *Plutella*<sup>10</sup>, *Tribolium*<sup>8</sup>,  
39 *Nasonia*<sup>8</sup>. and *Bombyx*<sup>11</sup>. In the phylum Nematoda only one species has been screened so far (*Caenorhabditis*  
40 *elegans*)<sup>12,13</sup>.

41

42 Little is known about the functionality of most lncRNA annotated to date, despite great efforts to characterize  
43 them. Most studies agree that expression of lncRNAs is often specific to certain tissues, cell types or  
44 developmental stages, and that their expression and sequence conservation are lower when compared to those of  
45 protein-coding genes<sup>14,15</sup>. In fact, lncRNAs seem to have a fast evolutionary turnover rate and therefore a large  
46 fraction of annotated lncRNAs may be species specific<sup>16</sup>. Understanding the evolutionary conservation of  
47 lncRNAs is challenging. On the one hand, overall sequence conservation is low despite some patches of sequence  
48 are highly conserved, which may be related with their functionality<sup>6,17,18</sup>. On the other hand, secondary structure  
49 seems to be important to maintain the function, as some lncRNAs with highly divergent sequences are known to  
50 conserve structure and therefore functionality<sup>19,20</sup>. Whether lncRNAs are overall highly structured is still unclear;  
51 some studies suggest that they might be less structured than protein-coding genes (at least *in vitro*)<sup>21</sup> while others  
52 suggest that they seem to be highly structured *in vivo*<sup>22</sup>. Importantly, a previous study found footprints of selection  
53 related with secondary structure, suggesting that the structural conformation may be selectively maintained at least  
54 in a fraction of lncRNAs<sup>18</sup>. In addition, experimentally-determined secondary structures are often not available for  
55 lncRNAs, and *in silico* predictions may not be highly accurate due to the difficulty of modeling long structures<sup>23</sup>.  
56 As a result, detecting homology between lncRNAs in different species is challenging.

57

58 To date several studies have aimed to identify lncRNA homology relationships in both vertebrate and insects.  
59 Most studies inferred homology relationships between lncRNAs predicted from RNAseq data from different  
60 species using sequence similarity (BLASTn or multiple sequence alignments), despite known limitations<sup>24-27</sup>. For  
61 instance, a previous study showed that more than 70% of the lncRNAs cannot be traced to homologs in species  
62 that diverged more than 50Myr ago<sup>25</sup>. Trying to predict lncRNA homologs extrapolating the coordinates in  
63 genome-wide alignments is a weak strategy, first because of the low overall conservation between species, and  
64 second because genomic sequence conservation does not necessarily imply conserved transcription<sup>25</sup>. Other  
65 authors suggested that homology relationships may be merely based on structural conservation. For instance,  
66 Toraninsson *et al* (2006) compared human and mouse genomes and detected regions with shared expression that

67 had a conserved secondary structure despite a lack of sequence conservation<sup>28</sup>. In a more recent study, Seemann *et*  
68 *al*<sup>19</sup> experimentally validated human-mouse lncRNA pairs with shared expression and structure despite their low  
69 abundance and low sequence similarity<sup>19</sup>. Another recent study failed to identify structure conservation in three  
70 well studied functional lncRNAs: HOTAIR, SRA and Xist<sup>29</sup>, but lately other authors detected structure  
71 conservation (in HOTAIR and RepA) by increasing alignment depth, using a sliding window approach and a more  
72 sensitive statistical metric<sup>30</sup>. Finally, others tried to identify orthologs using broader strategies, for example using  
73 microhomology, experimentally validated secondary structures and, in some cases, synteny<sup>31,32</sup>. However, and due  
74 to the complexity of this pipeline, it has so far only been applied to individual lncRNAs (e.g. roX, HOTAIR and  
75 COOLAIR).

76

77 We here set out to annotate lncRNAs in four different species of nematodes of the genus *Caenorhabditis* and  
78 study their evolutionary relationships. *Caenorhabditis remanei* and *C. brenneri* are out-crossing species while *C.*  
79 *elegans* and *C. briggsae* are hermaphroditic species, which evolved independently from out-crossing ancestors. Of  
80 note, out-crossing species are hyperdiverse (e.g. *C. brenneri* carries the highest molecular diversity described in  
81 any eukaryote<sup>33</sup>) while hermaphroditic species have very low levels of genetic polymorphism (e.g. *C. elegans*  
82 have lower genetic diversity levels than human<sup>34</sup>). In addition, divergence levels between *Caenorhabditis* species  
83 are quite high. An early study showed that species within *Caenorhabditis* are as genetically divergent as different  
84 orders in tetrapod classes<sup>35</sup>. In addition, synonymous-site divergence for *Caenorhabditis* species is saturated<sup>36,37</sup>.  
85 Synonymous substitution rate (ds) for *C. elegans* (0.52<sup>36</sup>) is much higher than for human (0.18<sup>38</sup>). However,  
86 synteny seems to be quite conserved among *Caenorhabditis* species, particularly for the X chromosome<sup>39</sup>. Given  
87 the high divergence between the studied species, we performed a large scale analysis to identify homology  
88 between lncRNAs annotated from RNAseq data using a combination of approaches: syntenic relationships,  
89 sequence conservation and structural conservation.

90

## 91 **2. Materials and methods**

### 92 **2.1. Worm Propagation**

93 Our study focused on four different *Caenorhabditis* worm species: *C. elegans* (N2 strain), *C. briggsae* (AF16), *C.*  
94 *remanei* (PB4641) and *C. brenneri* (PB2801). Worms were propagated on solid media in nematode growth  
95 medium (NGM) or in liquid S-Basal media with OP50.1 *E. coli* bacteria as food source at 20°C. Worms were  
96 synchronized by bleaching, L1 worms were plated at 500 worms per plate, and harvested at L4-Adult stage (3  
97 days growth). In liquid media, L1 worms were grown to late L4/early adult stage in 250 ml Erlenmeyer flasks at  
98 worm densities 1000 worms / ml in 50 ml S-Basal media containing OP50.1 bacteria at an initial OD600 = 1.0  
99 with shaking of 100rpm. Worms were harvested off plates or pelleted by centrifugation, washed 4 times with ice-  
100 cold M9 buffer by centrifugation at 200g for 1 min. After final centrifugation, M9 buffer was aspirated to the top  
101 of the worm pellet, and then a 4X volume of Trizol Reagent (ref. 15596026, ThermoFisher Scientific) was added  
102 and worms were flash-frozen in liquid nitrogen and stored at -80°C until RNA extraction.

## 103 2.2. Total RNA extraction and polyA selection

104 For total RNA extraction, samples underwent four rounds of freezing in liquid nitrogen, thawing in a 37°C water  
105 bath and vortexing for 1 min. After 5 min at room temperature, 180 µl of chloroform were added, samples were  
106 shaken vigorously for 15 sec to mix and then were incubated at room temperature for 2 min. After a centrifugation  
107 at 12000g, for 15 min at 4°C, the aqueous upper phase was transferred into a new tube, 500 µl of isopropanol were  
108 added and samples were frozen at -80°C for 20 min. Then, samples were centrifuged at 12,000g, for 15 min at 4°C  
109 to pellet the DNA, the supernatant was removed and discarded, and a final cleaning with 1 ml of cold 70% ethanol  
110 was done (centrifugation at 12,000g, for 10 min at 4°C). Finally, after removing the supernatant and leaving the  
111 tubes with the lid open to dry the pellet, 30 µl of RNase-free water were added to resuspend the samples. RNA  
112 samples were treated with DNase I (Invitrogen™, Carlsbad, California) following the manufacturer's guidelines  
113 to remove traces of Genomic DNA. Total RNA integrity and quantity of the samples were assessed using the  
114 Agilent 2100 bioanalyzer with the RNA 6000 Nano LabChip Kit (ref. 5067-1511, Agilent,) and NanoDrop 1000  
115 Spectrophotometer (Thermo Scientific). For three samples (*C. elegans*, *C. remanei* and *C. brenneri*) we obtained  
116 PolyA+ RNA after purifying total RNA by two rounds of selection using MicroPoly(A)Purist™ Kit according to  
117 manufacturer's instructions (ref. AM1919, Ambion), and the quality of the samples was controlled as above.

## 118 2.3. Library preparation and sequencing

119 Libraries were prepared using the TruSeq Stranded mRNA Sample Prep Kit v2 (ref. RS-122-2101/2, Illumina)  
120 according to the manufacturer's protocol for all samples. All reagents subsequently mentioned are from the TruSeq  
121 Stranded mRNA Sample Prep Kit v2 if not specified otherwise. For three samples, total RNA (Total\_ *C. elegans*,  
122 Total\_ *C. briggsae* and Total\_ *C. remanei*) was used to start the library preparation to check if they were differences  
123 between polyA+ RNA selection methods. For these samples, 1 µg of total RNA were used for poly(A)-mRNA  
124 selection using streptavidin-coated magnetic beads. This initial step was skipped in the already selected polyA+  
125 RNA samples (see above), for which 100 ng of the samples were used to start the library preparation. To assess the  
126 lower limit of detection of gene expression in these experiments, 1 µl of 1:10 dilution of Spike-In Mix 1 from  
127 ERCC RNA Spike-In Mix (ref. 4456740, Life Technologies) was added in two of the polyA+ RNA samples  
128 (*C.elegans* and *C.remanei*) before starting the library preparation. Briefly, all samples were subsequently  
129 fragmented to approximately 300bp. cDNA was synthesized using reverse transcriptase (SuperScript II, ref.  
130 18064-014, Invitrogen) and random primers. The second strand of the cDNA incorporated dUTP in place of dTTP.  
131 Double-stranded DNA was further used for library preparation. dsDNA was subjected to A-tailing and ligation of  
132 the barcoded Truseq adapters. All purification steps were performed using AMPure XP Beads (ref. A63881,  
133 Agencourt). Library amplification was performed by PCR on the size selected fragments using the primer cocktail  
134 supplied in the kit. Final libraries were analyzed using Agilent DNA 1000 chip (5067-1504, Agilent) to estimate  
135 the quantity and check size distribution, and were then quantified by qPCR using the KAPA Library  
136 Quantification Kit (ref. KK4835, KapaBiosystems) prior to amplification with Illumina's cBot. Libraries were  
137 loaded and sequenced 2 x 50 on Illumina's HiSeq 2000/2500.

138

## 139 2.4. Transcriptome assembly and *de novo* annotation of intergenic lncRNA in nematodes

140 We used RNAseq data to annotate lncRNAs *de novo*. In particular, we obtained stranded paired-end, 50bp-long  
141 read RNAseq data from *C. elegans* (2 biological replicas, 75 and 107 My reads each), *C. briggsae* (79 My reads),  
142 *C. remanei* (2 biological replicas, 103 and 110 My reads each) and *C. brenneri* (83 My reads). In those species  
143 having two biological replicas we added spike-ins to one of the libraries to evaluate the accuracy of the RNAseq  
144 experiment. The quality of the reads was assessed with FastQC<sup>40</sup>. No extra filtering was needed since the overall  
145 quality was high (average Phred quality score >34 in all samples) and no adapters were detected in the reads  
146 provided by the sequencing unit. We aligned reads to the reference genomes for each species available in  
147 WormBase version WS256 with TopHat v2.0.9<sup>41</sup>, which uses Bowtie v2.1.0.0 in the first step<sup>42</sup>. Then, we  
148 assembled aligned reads into individual transcripts with Cufflinks v2.2.1<sup>43</sup>. Finally, we used the utility  
149 Cuffcompare included in Cufflinks to annotate our transcript assemblies using a reference annotation, which helps  
150 to sort out new genes from those previously annotated. In those species with biological replicas we obtained a  
151 merged transcriptome using Cuffmerge, and we finally used Cuffquant and Cuffnorm to quantify the expression  
152 (in FPKM) of the reconstructed transcripts normalizing by library size. In addition, we used spike-ins to compare  
153 the estimated gene expression versus the expected provided by the company. The accuracy of the experiment was  
154 high since the correlation between the expected amount of spike-ins and the estimated in FPKM was >0.98 in all  
155 cases (**Supplementary Fig. S1**). The reproducibility of the experiment was also high, since the correlation of the  
156 estimated FPKM values for spike-ins between species was 0.99 (**Supplementary Fig. S1**). Thus, no extra filtering  
157 was performed to the reconstructed transcripts. To annotate lncRNA we first collected all reconstructed transcripts  
158 classified as lincRNA (only in *C. elegans*), ncRNA and unannotated, we removed those overlapping with protein-  
159 coding genes annotated in WS256 using BEDOPS tools<sup>44</sup> and we discarded transcripts shorter than 200 ncl  
160 (**Supplementary Table S1**). Finally, we evaluated the coding potential of the remaining transcripts using CPC  
161 v0.9<sup>45</sup> to obtain the final list of lncRNA candidate genes (1,059 in *C. briggsae*, 1,765 in *C. remanei*, 3,285 in *C.*  
162 *brenneri* and 1,526 in *C. elegans*, **Supplementary Table S1**).

163

## 164 2.5. Validation of lncRNA expression by semi-quantitative RT-PCR

165 RNA isolated from N2 strain and free of genomic DNA was reverse-transcribed into cDNA using SuperScript® II  
166 Reverse Transcriptase (Invitrogen™), including a minus reverse transcriptase control. Semi-quantitative RT-PCR  
167 was performed in a DNA engine tetrad 2 thermal cycler (Bio-Rad) with Taq Mix (Donsheng Biotech) and a final  
168 primer concentration of 0.5µM. The primers used in this study are listed in **Supplementary Table S2**. ‘Touch-  
169 down’ PCR amplification conditions were as follows: PCR started with denaturing step at 95°C for 2 min,  
170 followed by 15 cycles of touchdown amplification. Every cycle consisted in 3 steps, each for 30 seconds:  
171 denaturation at 95 °C, annealing (starting with a temperature 7°C higher than annealing temperature and  
172 decreasing -0.5°C per cycle until annealing temperature of primers), and an extension at 72°C. Then, 20 additional  
173 cycles were carried out at annealing temperature (57.3°C, 60.2 °C, 63.6 °C, 60.2 °C for XLOC\_040084,  
174 XLOC\_005215, XLOC\_007633, and XLOC\_036972, respectively). Final primer extension was performed at  
175 72°C for 5 minutes. All PCR and RT-PCR products were visualized in 1.5% agarose gels.

176

## 177 2.6. Classification of lncRNAs into blast-based families

178 We first performed BLASTn searches for pairs of species using an e-value cut-off of 1e-3. We then selected the  
179 reciprocal hits and we finally classified lncRNAs from the four different species into families using the in-house  
180 script `classifyFamiliesv5_VennGH.py` (see below).

181

## 182 2.7. Classification of lncRNA into secondary structure based families

183 To evaluate the presence of conserved structural elements within lncRNAs we used the software BEAGLE<sup>46</sup>. This  
184 software compares secondary structures encoded using the BEAR notation by performing pairwise global or local  
185 alignments and provides measures of structural similarity and statistical significance for each alignment. We used  
186 this software to compare the secondary structures of lncRNAs, intergenic regions and rRNAs, the two later used  
187 as negative and positive controls respectively. We first computed the secondary structures individually for each  
188 sequence using the RNAfold software from the Vienna Package 2.0 with default parameters<sup>47</sup>. The secondary  
189 structures computed with RNAfold were used as input for beagle. We ran beagle for all possible pairwise  
190 comparisons using local alignments since it has been observed that the function of some lncRNA is restricted to  
191 small regions with conserved secondary structure. We finally used the `classifyFamiliesv5_VennGH.py` script to  
192 classify sequences with significant matches ( $Z_{score} > 3$ ) into families (see below). Intergenic and rRNA sequences  
193 were obtained from Wormbase WS256. We ran the pipeline for the 102 rRNA sequences retrieved. For intergenic  
194 regions, for each of the 4 species we randomly selected 250 sequences between 200-1500 ncl, we discarded those  
195 containing candidate lncRNA and then we ran RNAfold and beagle as previously explained. We ran the pipeline  
196 for intergenic regions 50 times.

197

## 198 2.8. Classification of protein-coding genes and lncRNA into syntenic families

199 We further classified the candidate lncRNA into families based on syntenic relationship using an in-house python  
200 pipeline available in GitHub ([https://github.com/Gabaldonlab/projects/tree/master/syntenic\\_families](https://github.com/Gabaldonlab/projects/tree/master/syntenic_families)). First of all,  
201 we created a file including orthology relationships for all genes annotated in the four species using the  
202 `wormbase_orthoParalogsGH.py` script. Subsequently, we used the script `synteny_nematodesv4GH.py` to obtain a  
203 file including pairwise syntenic relationships between lncRNA from the four studied species. Briefly, the script  
204 compares the genomic context of lncRNA between two different species. The user can specify the number of  
205 genes that will consider at the left and the right sides of each lncRNA, the overall minimum of shared genes and  
206 the minimum number of shared genes at each side of the lncRNA. We ran this script considering three genes at  
207 each side of a given lncRNA, a minimum of overall 3 shared genes and a minimum of one shared gene in each  
208 side of a given lncRNA. Finally, we classified lncRNA from the four different species into families using the  
209 script `classifyFamiliesv5_VennGH.py`.

210

211 To validate the performance of our pipeline we analysed 1,000 protein-coding orthologous families randomly  
212 selected. We classified 50.3% of the selected genes, and in consequence the number of genes classified per  
213 syntenic family was significantly smaller compared to the orthologous families (median= 4 and 5 respectively, p-  
214 value =1.7e-80). The number of genes in a given syntenic family correctly assigned is significantly higher than the

215 not correctly assigned (median = 3 and 0 respectively, p-value= 2.4e-217). 19.8% of the syntenic families include  
216 genes from more than one orthologous family; in those cases we discarded the orthologous family having the  
217 lower number of shared genes. Overall, the number of genes from the matched orthologous family not assigned is  
218 quite low (median=1) and significantly smaller than the number of genes per orthologous family (median = 1 and  
219 5 respectively, p-value=1.7e-135). Overall the percentage of genes correctly assigned per syntenic family is very  
220 high (median=100%, mean= 92.1%) and most of the genes for each orthologous family were classified in a given  
221 syntenic family (median =75%, mean=66.7%). Altogether these results indicates that the rate of misclassification  
222 using our pipeline is very low but also that roughly half of the genes could not be classified using our syntenic  
223 approach.

224

## 225 2.9. Sequence conservation and motifs

226 We also used a blast strategy to identify syntenic families with some degree of sequence conservation. We  
227 performed a BLASTn search of all annotated genes against themselves and we discarded those genes with no hit  
228 using a relaxed e-value of 1e-3. Motif identification was performed using the MEME suit (version 4.11.4)<sup>47</sup>, using  
229 windows ranging from 10-40 ncl and an e-value threshold of 0.1. We searched for motifs in each of the syntenic  
230 families and for 1,000 randomly generated families as a control. Random families are comprised of sequences  
231 belonging to different syntenic families that may belong or not to the same species.

232

## 233 2.10. Identification of conserved structures within lncRNAs

234 Since secondary structure is difficult to predict for long sequences, we split the sequences in overlapping windows  
235 of 80ncl + 40 step and 200ncl +100 step, and repeated the analyses described above (RNAfold + Beagle, detailed  
236 in section 2.6). We finally calculated the accessibility per position using the RNAplfold from the Vienna Package  
237 2.0, using a window length of 80ncl and -u4 and -u10 options.

238

## 239 3. Results and discussion

### 240 3.1. De novo annotation of intergenic lncRNA in nematodes

241 Our study aimed to *de novo* annotate lncRNAs in four different *Caenorhabditis* worm species (*C. elegans*, N2  
242 strain; *C. briggsae* AF16; *C. remanei* PB4641; and *C. brenneri* PB2801) and to establish homology relationships  
243 between them. Thus, the first step consisted of obtaining high quality RNAseq data. Since lncRNAs are expressed  
244 in a stage-dependent manner<sup>12</sup>, worms were synchronized and harvested at the same developmental stage (see  
245 material and methods for details). We followed an experimental protocol to obtain stranded paired-end, 50bp-long  
246 read RNAseq data from the four studied species. Subsequently, we applied a bioinformatics pipeline to annotate  
247 candidate lncRNAs after assessing the accuracy and the reproducibility of the experiment using spike-ins from  
248 reference molecules (see material and methods). After discarding candidate transcripts overlapping protein-coding  
249 genes, shorter than 200 nucleotides, or showing signals of coding potential, we obtained the final list of candidate  
250 lncRNA genes: 1,059 in *C. briggsae*, 1,765 in *C. remanei*, 3,285 in *C. brenneri* and 1,526 in *C. elegans*  
251 (**Supplementary Table S1**, see material and methods for details). We next checked whether any lncRNAs in our



252 data set was known to be functional. There are currently four experimentally-validated functional lncRNAs in *C.*  
253 *elegans* according to lncRNADB<sup>48</sup>. Of these, *Linc-3* and *Rncs-1* genes are included in our catalog but *YRNAs* and  
254 *7sk* genes were filtered by our pipeline, as they are both shorter than 200ncl. We finally selected four lncRNAs  
255 (XLOC\_040084, XLOC\_005215, XLOC\_007633, and XLOC\_036972) to confirm the expression of their  
256 transcripts at stage L4/adult in wild type strain N2. In brief, we isolated RNA, reverse-transcribed it into cDNA,  
257 and amplified target regions of the transcripts along with a positive control of genomic DNA and a negative  
258 control of minus reverse transcriptase. Results were resolved in a 1.5% agarose gel. As shown in **Supplementary**  
259 **Fig. S2**, all four fragments were amplified by RT-PCR confirming the expression observed by RNA-sequencing.

260

261 The largest number of candidate lncRNAs were annotated in the two out-crossing species, especially in *C.*  
262 *brenneri* (**Supplementary Table S1**). We tested whether the polyA enrichment performed in different steps of the  
263 protocol and using different kits (see material and methods) may influence the annotation of lncRNAs. For this,  
264 we compared the expression values of all the annotated lncRNAs in the two species that were sequenced using the  
265 two protocols (*C. elegans* and *C. remanei*). Genes expression values assessed from data obtained the two  
266 protocols were highly correlated ( $r^2=0.92$  for *C. elegans*,  $r^2=0.90$  for *C. remanei*, **Supplementary Fig. S3**) and  
267 therefore the two library preparation methods do not seem to bias the gene expression quantification. In agreement  
268 with our finding, the number of annotated protein-coding genes in their reference genomes is also higher in *C.*  
269 *remanei* and *C. brenneri* (31,436 and 30,660 respectively in WS256) than in *C. elegans* and *C. briggsae* (20,251  
270 and 22,504 respectively in WS256). In *Caenorhabditis* species the genome size of self-fertile nematodes such as  
271 *C. elegans* and *C. briggsae* is 20-40% smaller than out-crossing species such as *C. remanei* and *C. brenneri*<sup>39</sup>. This  
272 reduction seems to be caused by patterns of gene losses affecting different gene types in roughly similar  
273 proportions<sup>39</sup>. This may explain why in the out-crossing species we annotated more lncRNAs than in the  
274 hermaphroditic ones.

275

276 We compared GC content, length, number of exons and expression levels for the annotated lncRNAs and protein-  
277 coding genes in the four studied species. Overall, protein-coding genes are longer, have a larger number of exons,  
278 have higher GC content and are expressed at higher levels than lncRNAs and, in all cases, differences are  
279 significant ( $p\text{-value}<2.2e-16$  for all comparisons, **Fig. 1**). Thus, our results are in agreement with previous  
280 findings in other species<sup>8,49</sup> and suggest that, despite the radically different sexual behaviours in the studied  
281 species, the major differences are protein-coding-lncRNA instead of species driven.

282

### 283 3.2. Synteny as a proxy to identify homologous lncRNAs

284 Establishing homology relationships among lncRNAs is challenging due to their low sequence conservation. Even  
285 more challenging is the establishment of homology relationships between lncRNAs of species as divergent as the  
286 nematodes considered here. Nevertheless, we made a first attempt to classify genes using a reciprocal BLASTn  
287 hits approach. To do so, we first performed BLASTn searches for pairs of species using an e-value cut-off of 1e-3.  
288 We then selected the reciprocal hits and we finally classified lncRNAs from the four different species into clusters  
289 of co-expressed genes using an in-house script (see material and methods, **Supplementary Table S3**). As

290 expected, the number of genes classified into families was very low (204 out of 7635, **Fig. 2A**). Most of the  
291 families (64) comprised transcripts from merely two species, 12 families included transcripts from three species  
292 and no families included transcripts from the four species (**Fig. 2A**).

293

294 Knowing that selection may act on conservation of the secondary structure rather than on sequence, we analyzed  
295 the patterns of structural conservation of lncRNAs. Since lncRNAs are known to be weakly conserved at the  
296 sequence level, we used the software BEAGLE<sup>46</sup> to study the secondary structure similarity of lncRNAs, since this  
297 algorithm compares structures without requiring a sequence alignment. The software provides an associated z-  
298 score for each comparison, and a z-score higher than three is indicative of significant similarities. We classified  
299 transcripts with significant matches (Zscore =>3) into families (**Supplementary Table S4**). Most of the genes  
300 were classified into families (6,538 out of 7,635 genes, **Fig. 2B**). The majority of the families (2,204) comprised  
301 genes from two species, 363 families included transcripts from three species and 45 families included transcripts  
302 from the four species (**Fig. 2B**). Secondary structure is difficult to predict for long sequences as lncRNAs<sup>23</sup>, and  
303 therefore predictions should be considered with caution.

304

305 We also used a syntenic approach to classify lncRNAs into clusters of co-expressed syntenic genes, referred  
306 hereafter as syntenic families. Syntenic families include genes from the different species that share the same  
307 genomic context, meaning that they are surrounded by orthologous genes. Therefore, genes within each family are  
308 likely to share orthology relationships. To do so, we implemented a custom pipeline (see Materials and Methods).  
309 We benchmarked this pipeline with randomly-chosen 1000 protein-coding orthologous families, containing 1,000  
310 *C. elegans*, 1,232 *C. briggsae*, 1,870 *C. remanei* and 1,646 *C. brenneri* genes. Our pipeline classified a total of  
311 2,895 orthologous genes in syntenic families (61.2% in *C. elegans*, 56.9% in *C. briggsae*, 47.4% in *C. brenneri*  
312 and 42.9% in *C. remanei*), meaning that our pipeline classified roughly half of the genes. We assessed the  
313 correspondence between syntenic relationships and the known orthology relationships of the protein-coding  
314 genes. The positive predictive value is 73%, meaning that synteny-based orthology assignments are very likely to  
315 be correct. Importantly, 80.2% of the syntenic families include genes from a single orthologous family, meaning  
316 that syntenic families are not likely to be fragmented. We evaluated whether the chance of detecting syntenic  
317 families is affected by the phylogenetic distance, we compared the number of classified syntenic families  
318 including any of the two most closely related species (*C. briggsae* and *C. remanei*) (**Supplementary Table S5**).  
319 The number of families does not drop when increasing the phylogenetic distance, suggesting that *Caenorhabditis*  
320 genomes are highly reshuffled even for closely related species. However, other factors may affect the chance of  
321 detecting syntenic families. For instance, *C. briggsae* and *C. elegans* are the only two species in which their  
322 genomes are assembled in six chromosomes and this completeness of the genome may favor the detection of  
323 syntenic families. Altogether, we can use our conservative method as a proxy to detect homology relationships  
324 between lncRNAs, even in the absence of sequence conservation (see Materials and Methods for more details)

325

326 The number of syntenic families and lncRNAs classified per species is shown in **Fig. 2C** and **Supplementary**  
327 **Table S6**. We classified 20% of the lncRNAs (1,532 out of 7,635) into syntenic families, which is a much lower

328 rate than for protein-coding genes (50.3%). This result supports the idea that most lncRNAs may be species  
329 specific and that lncRNA families have a rapid turnover<sup>6,16</sup>. Similar to protein-coding genes, the number of  
330 syntenic families is independent of the phylogenetic distance (**Supplementary Table S5**). Of note, 25 families  
331 contains genes from the four studied species, suggesting that their functions during development may be  
332 conserved in *Caenorhabditis*. Interestingly, the functional lncRNA *Rncs-1* is included in the syntenic family 146,  
333 which also includes two *C. remanei* genes.

334

### 335 3.3. Identification of conserved motifs across syntenic families.

336 As most lncRNAs exhibit weak or untraceable primary sequence conservation, we used a motif-based search  
337 method to identify conserved domains in different species. Using the MEME suite<sup>47</sup> we searched for motifs within  
338 the syntenic families. We found that 14.6% of the syntenic families (75 out of 514) shared motifs between at least  
339 two of the four species (**Supplementary Table S7**). To evaluate whether this number is higher than expected by  
340 chance, we randomly generated 1,000 artificial families shuffling genes from different families and searching for  
341 motifs. We found that only 3 families (0.3%) shared conserved motifs in these randomized controls, supporting  
342 that syntenic families are enriched in conserved sequence motifs. We also used a blast strategy to evaluate the  
343 presence of conserved regions. We performed BLASTn searches within the syntenic families using an e-value  
344 threshold of 1e-3. Then we computed a blast score for each family, dividing the number of blast hits by the  
345 number of pairwise comparisons (including genes from the same species). 13.23% of the syntenic families (68 out  
346 of 514) had a minimum score of 0.01 or higher (**Supplementary Table S8**). This number is higher than expected  
347 by random, since the score was 0 in all cases when we applied this procedure to randomized families. Importantly,  
348 roughly half (35 out of 68) of the families with blast hits also presented conserved motifs. Those are strong  
349 candidate genes to be functional, since minor sequence conservation may be sufficient to ensure conserved  
350 lncRNAs functionality. For instance, it has been shown that lncRNAs in one species can functionally replace its  
351 ortholog in another species despite a very low sequence conservation<sup>31</sup>.

352

### 353 3.4. Structural conservation of syntenic lncRNAs

354 We first compared the secondary structure of lncRNAs, intergenic and ribosomal sequences, using the two later  
355 as negative and positive controls, respectively. Overall structure conservation of lncRNAs is lower than for  
356 ribosomal RNAs and similar to intergenic sequences (**Supplementary Fig. S4**). Thus, structural similarities found  
357 among lncRNAs are weaker than those expected for rRNAs, which are known to be highly structured. Since  
358 previous studies suggest that secondary structure is difficult to predict for long sequences<sup>23</sup>, we also evaluated  
359 whether syntenic families are enriched in conserved structures after splitting the sequences in overlapping  
360 windows of 80ncl +40 step and 200ncl +100 step. As a control, we randomized sequences from different families.  
361 The mean z-score for the syntenic families was lower than three and not significantly different from the  
362 randomized sequences, supporting that the secondary structure conservation within families is overall weak. We  
363 next assessed, from predicted structures, whether the above described sequence motifs were associated to  
364 particular secondary structures. Importantly, we detected that accessibility (meaning the probability of being

365 within unpaired regions) is significantly higher for regions covered with motifs (p-value=4.3e-08 for -u4; p-  
366 value=2.3e-08 for -u10; **Supplementary Fig. S5**). Considering this, we hypothesize that these motifs may be  
367 involved in binding with other molecules and therefore they may play a role in the functionality of these  
368 lncRNAs.

369

370

#### 371 **4. Concluding remarks**

372

373 To identify homology within lncRNAs from different species we can use sequence conservation, structural  
374 conservation and syntenic relationships. Nematodes are highly divergent at the sequence level and lncRNAs are  
375 known to evolve fast, hampering the use of sequence conservation approaches. Instead, we used a synteny-driven  
376 strategy that was shown to be an accurate proxy for homology, based on an assessment on protein-coding genes  
377 with known orthology relationships. We next refined our results using sequence conservation and structural  
378 information. The fraction of lncRNAs classified in syntenic families is lower than for protein-coding genes,  
379 suggesting that a large fraction of the predicted lncRNA may be species specific. Genes within families are  
380 enriched in conserved motifs which have significant higher accessibility and therefore are more likely to be  
381 unpaired. Further studies are needed to elucidate whether these highly accessible motifs conserved in different  
382 species are important for their functionality by bounding to other molecules. Finally, we show that the reduction in  
383 the genome size of the self-fertile nematodes also affects the lncRNA class, since in these species the number of  
384 annotated lncRNA was lower than in out-crossing species. We provide the first catalog of lncRNAs in nematodes  
385 including species specific genes, which may be a potential source for novel functions, and genes sharing  
386 homology between species, which may be important for their development.

387

388

#### 389 **Conflict of interest**

390 None declared.

391

#### 392 **Supplementary data**

393 Supplementary data are available.

394

#### 395 **Acknowledgments and funding**

396 We are very grateful to Eugenio Mattei for kindly providing us a local version of the Beagle software. We also  
397 thank Aaron M. New for his help with worm cultures and RNA extraction and Marcos Francisco Pérez for his  
398 advice in the validation of lncRNA expression. TG group acknowledges support from the Spanish Ministry of  
399 Economy, Industry, and Competitiveness (MEIC) for the EMBL partnership, and grants ‘Centro de Excelencia  
400 Severo Ochoa 2013-2017’ SEV-2012-0208, and BFU2015-67107 cofounded by European Regional Development  
401 Fund (ERDF); from the CERCA Programme / Generalitat de Catalunya; from the Catalan Research Agency  
402 (AGAUR) SGR857, and grant from the European Union’s Horizon 2020 research and innovation programme

403 under the grant agreement ERC-2016-724173 the Marie Skłodowska-Curie grant agreement No H2020-MSCA-  
404 ITN-2014-642095.  
405  
406

- 407 1. Brown, C. J., Ballabio, a, Rupert, J. L., et al. 1991, A gene from the region of the human X  
408 inactivation centre is expressed exclusively from the inactive X chromosome. *Nature*, **349**, 38–44.
- 409 2. Brannan, C. I., Dees, E. C., Ingram, R. S., and Tilghman, S. M. 1990, The product of the H19 gene  
410 may function as an RNA. *Mol Cell Biol*, **10**, 28–36.
- 411 3. Iyer, M. K., Niknafs, Y. S., Malik, R., et al. 2015, The landscape of long noncoding RNAs in the  
412 human transcriptome. *Nat. Genet.*, **47**, 199–208.
- 413 4. Young, R. S., Marques, A. C., Tibbit, C., et al. 2012, Identification and properties of 1,119 candidate  
414 lincRNA loci in the *Drosophila melanogaster* genome. *Genome Biol. Evol.*, **4**, 427–42.
- 415 5. Nyberg, K. G., and Machado, C. A. 2016, Comparative Expression Dynamics of Intergenic Long  
416 Noncoding RNAs in the Genus *Drosophila*. *Genome Biol. Evol.*, **8**, 1839–58.
- 417 6. Jenkins, A. M., Waterhouse, R. M., and Muskavitch, M. A. 2015, Long non-coding RNA discovery  
418 across the genus *Anopheles* reveals conserved secondary structures within and beyond the Gambiae  
419 complex. *BMC Genomics*, **16**, 337.
- 420 7. Etebari, K., Asad, S., Zhang, G., and Asgari, S. 2016, Identification of *Aedes aegypti* Long Intergenic  
421 Non-coding RNAs and Their Association with *Wolbachia* and Dengue Virus Infection. *PLoS Negl.*  
422 *Trop. Dis.*, **10**, 1–18.
- 423 8. Lopez-Ezquerria, A., Harrison, M. C., and Bornberg-Bauer, E. 2017, Comparative analysis of  
424 lincRNA in insect species. *BMC Evol. Biol.*, **17**, 155.
- 425 9. Ferreira, P. G., Patalano, S., Chauhan, R., et al. 2013, Transcriptome analyses of primitively eusocial  
426 wasps reveal novel insights into the evolution of sociality and the origin of alternative phenotypes.  
427 *Genome Biol.*, **14**, R20.
- 428 10. Etebari, K., Furlong, M. J., and Asgari, S. 2015, Genome wide discovery of long intergenic non-  
429 coding RNAs in Diamondback moth (*Plutella xylostella*) and their expression in insecticide resistant  
430 strains. *Sci. Rep.*, **5**, 14642.
- 431 11. Wu, Y., Cheng, T., Liu, C., et al. 2016, Systematic identification and characterization of long non-  
432 coding RNAs in the silkworm, *Bombyx mori*. *PLoS One*, **11**, 1–25.
- 433 12. Nam, J.-W., and Bartel, D. P. 2012, Long noncoding RNAs in *C. elegans*. *Genome Res.*, **22**, 2529–40.
- 434 13. Akay, A., Jordan, D., Navarro, I. C., et al. 2018, Identification of functional long non-coding RNAs in  
435 *C. elegans*. *bioRxiv*, 383919.
- 436 14. Nitsche, A., and Stadler, P. F. 2016, Evolutionary clues in lncRNAs. *Wiley Interdiscip. Rev. RNA*.
- 437 15. Ulitsky, I. 2016, Evolution to the rescue: using comparative genomics to understand long non-coding  
438 RNAs. *Nat. Rev. Genet.*, **17**, 601–14.
- 439 16. Kutter, C., Watt, S., Stefflova, K., et al. 2012, Rapid turnover of long noncoding RNAs and the  
440 evolution of gene expression. *PLoS Genet.*, **8**, e1002841.
- 441 17. Ulitsky, I., Shkumatava, A., Jan, C. H., Sive, H., and Bartel, D. P. 2011, Conserved function of  
442 lincRNAs in vertebrate embryonic development despite rapid sequence evolution. *Cell*, **147**, 1537–  
443 50.
- 444 18. Pegueroles, C., and Gabaldón, T. 2016, Secondary structure impacts patterns of selection in human

- 445 lncRNAs. *BMC Biol.*, **14**, 60.
- 446 19. Seemann, S. E., Mirza, A. H., Hansen, C., et al. 2017, The identification and functional annotation of  
447 RNA structures conserved in vertebrates. *Genome Res.*, **27**, 1371–83.
- 448 20. Johnsson, P., Lipovich, L., Grandér, D., and Morris, K. V. 2014, Evolutionary conservation of long  
449 non-coding RNAs; sequence, structure, function. *Biochim. Biophys. Acta*, **1840**, 1063–71.
- 450 21. Yang, J.-R., and Zhang, J. 2015, Human long noncoding RNAs are substantially less folded than  
451 messenger RNAs. *Mol. Biol. Evol.*, **32**, 970–7.
- 452 22. Spitale, R. C., Flynn, R. A., Zhang, Q. C., et al. 2015, Structural imprints in vivo decode RNA  
453 regulatory mechanisms. *Nature*, **519**, 486–90.
- 454 23. Novikova, I. V., Dharap, A., Hennelly, S. P., and Sanbonmatsu, K. Y. 2013, 3S: Shotgun secondary  
455 structure determination of long non-coding RNAs. *Methods*, **63**, 170–7.
- 456 24. Necsulea, A., Soumillon, M., Warnefors, M., et al. 2014, The evolution of lncRNA repertoires and  
457 expression patterns in tetrapods. *Nature*, **505**, 635–40.
- 458 25. Hezroni, H., Koppstein, D., Schwartz, M. G., Avrutin, A., Bartel, D. P., and Ulitsky, I. 2015,  
459 Principles of Long Noncoding RNA Evolution Derived from Direct Comparison of Transcriptomes in  
460 17 Species. *Cell Rep.*, **11**, 1–13.
- 461 26. Washietl, S., Kellis, M., and Garber, M. 2014, Evolutionary dynamics and tissue specificity of human  
462 long noncoding RNAs in six mammals. *Genome Res.*, **24**, 616–28.
- 463 27. Chen, J., Shishkin, A. A., Zhu, X., et al. 2016, Evolutionary analysis across mammals reveals distinct  
464 classes of long non-coding RNAs. *Genome Biol.*, **17**, 19.
- 465 28. Torarinsson, E., Sawera, M., Havgaard, J. H., et al. 2006, Thousands of corresponding human and  
466 mouse genomic regions unalignable in primary sequence contain common RNA structure. *Genome*  
467 *Res.*, **16**, 885–9.
- 468 29. Rivas, E., Clements, J., and Eddy, S. R. 2017, Lack of evidence for conserved secondary structure in  
469 long noncoding RNAs. *Nat. Methods*, **14**, 45–8.
- 470 30. Tavares, R. C. A., Pyle, A. M., and Somarowthu, S. 2018, Covariation analysis with improved  
471 parameters reveals conservation in lncRNA structures. *bioRxiv*.
- 472 31. Quinn, J. J., Zhang, Q. C., Georgiev, P., Ilik, I. a, Akhtar, A., and Chang, H. Y. 2016, Rapid  
473 evolutionary turnover underlies conserved lncRNA – genome interactions. *Genes Dev.*, **30**, 191–207.
- 474 32. Hawkes, E. J., Hennelly, S. P., Novikova, I. V., Irwin, J. A., Dean, C., and Sanbonmatsu, K. Y. 2016,  
475 COOLAIR Antisense RNAs Form Evolutionarily Conserved Elaborate Secondary Structures. *Cell*  
476 *Rep.*, **16**, 3087–96.
- 477 33. Dey, A., Chan, C. K. W., Thomas, C. G., and Cutter, A. D. 2013, Molecular hyperdiversity defines  
478 populations of the nematode *Caenorhabditis brenneri*. *Proc. Natl. Acad. Sci. U. S. A.*, **110**, 11056–60.
- 479 34. Cutter, A. D., Jovelin, R., and Dey, A. 2013, Molecular hyperdiversity and evolution in very large  
480 populations. *Mol. Ecol.*, **22**, 2074–95.
- 481 35. Fitch, D. H., Bugaj-Gaweda, B., and Emmons, S. W. 1995, 18S ribosomal RNA gene phylogeny for  
482 some Rhabditidae related to *Caenorhabditis*. *Mol. Biol. Evol.*, **12**, 346–58.

- 483 36. Cutter, A. D. 2008, Divergence times in *Caenorhabditis* and *Drosophila* inferred from direct estimates  
484 of the neutral mutation rate. *Mol. Biol. Evol.*, **25**, 778–86.
- 485 37. Shabalina, S. A., and Kondrashov, A. S. 1999, Pattern of selective constraint in *C. elegans* and *C.*  
486 *briggsae* genomes. *Genet. Res.*, **74**, 23–30.
- 487 38. Pegueroles, C., Laurie, S., and Albà, M. M. 2013, Accelerated evolution after gene duplication: a  
488 time-dependent process affecting just one copy. *Mol. Biol. Evol.*, **30**, 1830–42.
- 489 39. Fierst, J. L., Willis, J. H., Thomas, C. G., et al. 2015, Reproductive Mode and the Evolution of  
490 Genome Size and Structure in *Caenorhabditis* Nematodes. *PLoS Genet.*, **11**, 1–25.
- 491 40. Andrews, S. 2010, FastQC A Quality Control tool for High Throughput Sequence Data.  
492 <http://www.bioinformatics.babraham.ac.uk/projects/fastqc/>.
- 493 41. Kim, D., Pertea, G., Trapnell, C., Pimentel, H., Kelley, R., and Salzberg, S. L. 2013, TopHat2:  
494 accurate alignment of transcriptomes in the presence of insertions, deletions and gene fusions.  
495 *Genome Biol.*, **14**, R36.
- 496 42. Langmead, B., and Salzberg, S. L. 2012, Fast gapped-read alignment with Bowtie 2. *Nat. Methods*, **9**,  
497 357–9.
- 498 43. Trapnell, C., Roberts, A., Goff, L., et al. 2012, Differential gene and transcript expression analysis of  
499 RNA-seq experiments with TopHat and Cufflinks. *Nat. Protoc.*, **7**, 562–78.
- 500 44. Neph, S., Kuehn, M. S., Reynolds, A. P., et al. 2012, BEDOPS: high-performance genomic feature  
501 operations. *Bioinformatics*, **28**, 1919–20.
- 502 45. Kong, L., Zhang, Y., Ye, Z.-Q., et al. 2007, CPC: assess the protein-coding potential of transcripts  
503 using sequence features and support vector machine. *Nucleic Acids Res.*, **35**, W345–9.
- 504 46. Mattei, E., Pietrosanto, M., Ferrè, F., and Helmer-Citterich, M. 2015, Web-Beagle: a web server for  
505 the alignment of RNA secondary structures. *Nucleic Acids Res.*, **43**, W493–7.
- 506 47. Bailey, T. L., Boden, M., Buske, F. A., et al. 2009, MEME Suite: Tools for motif discovery and  
507 searching. *Nucleic Acids Res.*, **37**, 202–8.
- 508 48. Quek, X. C., Thomson, D. W., Maag, J. L. V, et al. 2014, lncRNADB v2.0: expanding the reference  
509 database for functional long noncoding RNAs. *Nucleic Acids Res.*, **43**, 168–73.
- 510 49. Haerty, W., and Ponting, C. P. 2015, Unexpected selection to retain high GC content and splicing  
511 enhancers within exons of multiexonic lncRNA loci. *RNA*, **21**, 1–13.  
512



## 513 **Figures and tables**

514 **Figure 1:** Box-plots showing length **(A)**, number of exons **(B)**, GC content **(C)**, and expression values **(D)** for the  
515 annotated protein-coding and lncRNA genes in all studied species. In Figure 2D we discarded genes with  
516  $\log_2(\text{FPKM}) < 0$ .

517

518 **Figure 2:** Venn diagram showing the number of lncRNA families (in bold) and genes for the blast **(A)**, secondary  
519 structure **(B)** and syntenic classification **(C)**. *C. elegans* in blue, *C. briggsae* in dark pink, *C. remanei* in orange  
520 and *C. brenneri* in light pink.

521

522 **Supplementary Figure S1:** Expected and estimated amount of spike-ins in  $\log_2(\text{FPKM})$  for *C. elegans* **(A)**, *C.*  
523 *remanei* **(B)** and between the two species **(C)**.

524

525 **Supplementary Figure S2.** LncRNAs endogenous expression of wild type strain N2 at L4/adult stage determined  
526 by semi-quantitative RT-PCR. Agarose gel (1.5%) showing the amplification product of reverse transcribed (RT)  
527 lncRNAs: **XLOC\_040084** (lane 2-5), **XLOC\_005215** (lane 6-9), **XLOC\_007633** (lane 10-13), **XLOC\_036972**  
528 (lane 14-17). **Lane 1:** 1Kb Plus Ladder, **lane 2, 6, 10, 14:** N2 genomic DNA (positive control), **lane 3, 7, 11, 15:**  
529 N2 cDNA, **lane 4, 8, 12, 16:** minus reverse transcriptase control (RT negative control), **lane 5, 9, 13, 17:** no-  
530 template control (NTC, RT-PCR negative control), **lane 18:** Low Molecular Weight ladder (LMW).

531

532 **Supplementary Figure S3:** Expression values of lncRNA (expressed in  $\log_2(\text{FPKM})$ ) using the two different  
533 protocols for *C. elegans* and *C. remanei*.

534

535 **Supplementary Figure S4:** Density plot showing z-scores estimated using Beagle software for random intergenic  
536 regions, lncRNA classified in syntenic families and rRNA. Dashed vertical line is located in  $z\text{-score}=3$ .

537

538 **Supplementary Figure S5:** Accessibility values for positions covered or not by motifs using -u10 or -u4  
539 parameters.

540

541 **Supplementary Table S1:** Annotation of lncRNA in the four *Caenorhabditis* species.

542

543 **Supplementary Table S2.** List of primers used in the study to validate expression of lncRNAs by semi-  
544 quantitative RT-PCR. Abbreviations: melting temperature ( $T_m$ ), nucleotides (nt), base pairs (bp).

545

546 **Supplementary Table S3:** Clusters of co-expressed genes with sequence similarity according to the reciprocal  
547 BLASTn hits approach used (see material and methods for details).

548

549 **Supplementary Table S4:** Clusters of co-expressed genes with secondary structure similarity estimated using  
550 BEAGLE software (see material and methods for details).

551

552 **Supplementary Table S5:** Number of clusters of co-expressed syntenic genes (proteing coding genes and  
553 lncRNA) including any of the two most closely related species (*C. briggsae* and *C. remanei*).

554

555 **Supplementary Table S6:** Clusters of co-expressed syntenic genes (see material and methods for details).

556

557 **Supplementary Table S7:** Table showing the syntenic families with significant MEME motifs.

558

559 **Supplementary Table S8:** Blast scores computed for the syntenic families (see material and methods for details).

560 **Figure 1**

561

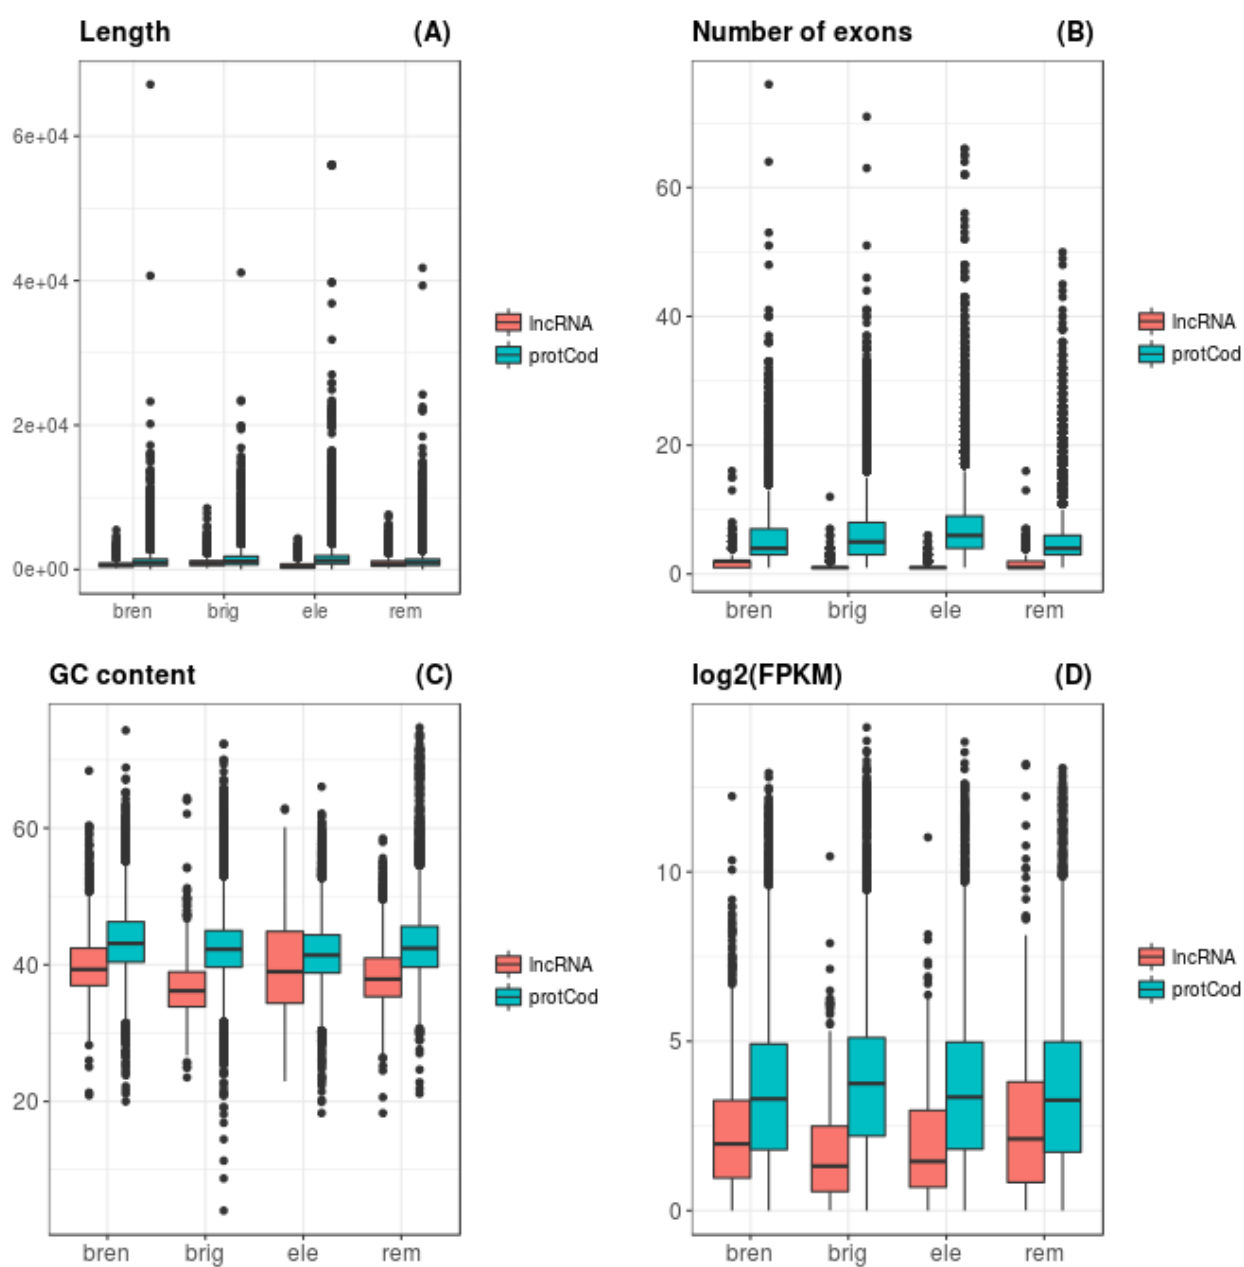

563 **Figure 2**

564

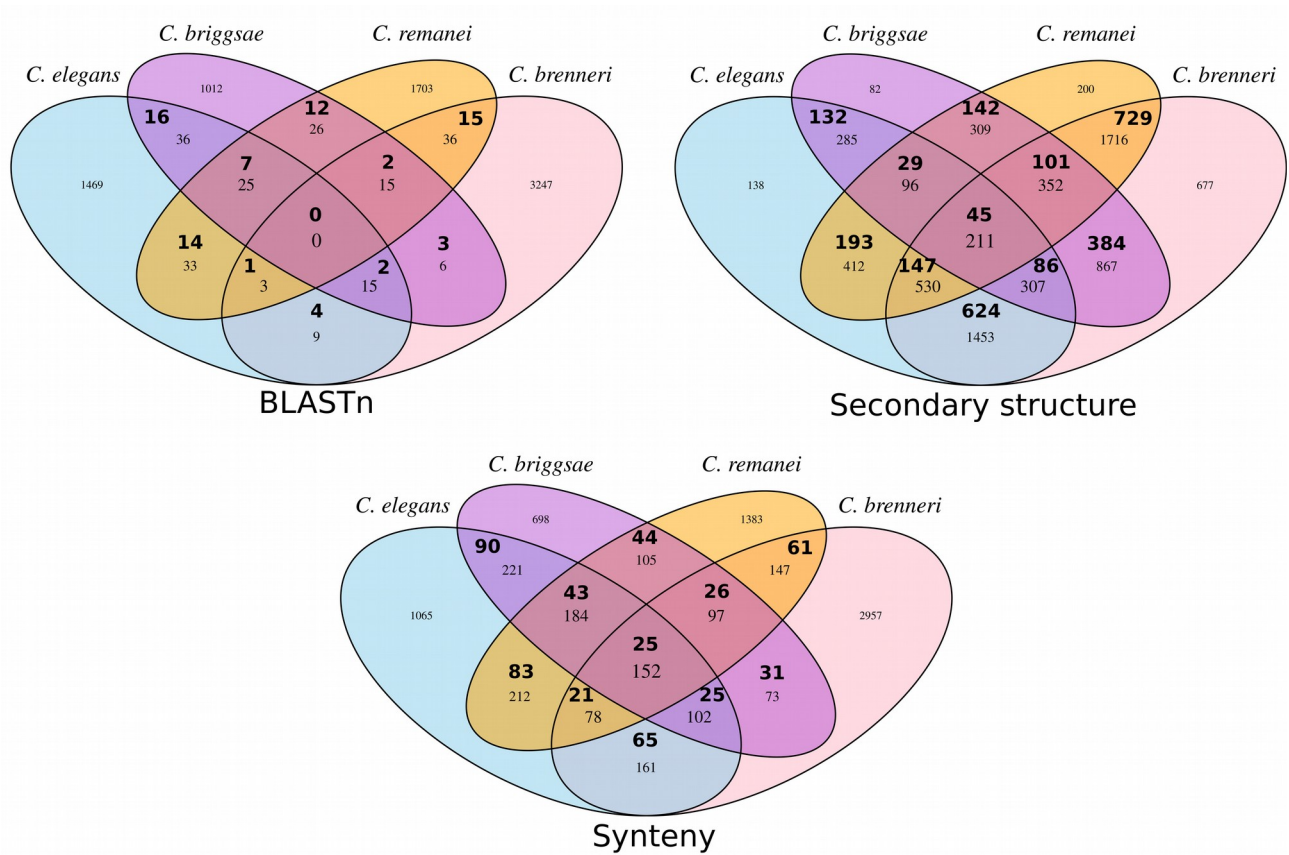

Source: http://biorxiv.org/content/10.1101/411561v1.full.pdf
